# Supplementary material for: Complex DNA Architectonics—Self-Assembly of Amphiphilic Oligonucleotides into Ribbons, Vesicles, and Asterosomes
Source: PubMed Central journal article supplement — Bioconjug Chem. 2022 Mar 31;34(1):70–7. doi: 10.1021/acs.bioconjchem.2c00077 (PMC9854621; doi:10.1021/acs.bioconjchem.2c00077), 2022-03-31
Supplement: bc2c00077_si_001.pdf [file bc2c00077_si_001.pdf]

## Supporting Information

# Complex DNA Architectonics – Self-Assembly of Amphiphilic Oligonucleotides into Ribbons, Vesicles, and Asterosomes

Simon Rothenbühler,<sup>†</sup> Ioan Iacovache,<sup>‡</sup> Simon M. Langenegger,<sup>†</sup> Benoît Zuber,<sup>‡</sup> and Robert Häner<sup>\*†</sup>

<sup>†</sup> Department of Chemistry, Biochemistry and Pharmaceutical Sciences, University of Bern,  
Freiestrasse 3, CH – 3012 Bern, Switzerland

<sup>‡</sup> Institute of Anatomy, University of Bern, Baltzerstrasse 2, CH – 3012 Bern, Switzerland

## Table of Contents

|                                          |     |
|------------------------------------------|-----|
| 1. General Methods.....                  | S1  |
| 2. Preparation of Oligonucleotides ..... | S2  |
| 3. UV-Vis and Fluorescence Spectra.....  | S8  |
| 4. Cryo-EM Images .....                  | S9  |
| 5. Distance Measurements .....           | S13 |
| 6. AFM Images.....                       | S17 |
| 7. References .....                      | S20 |

### 1. General Methods

All reagents and solvents were purchased from commercial suppliers and used without further purification. The synthesis of (*E*)-4-(4-(2-(4-(4-(bis(4-methoxyphenyl)(phenyl)methoxy)but-1-yn-1-yl)phenyl)-1,2-diphenylvinyl)phenyl)but-3-yn-1-yl (2-cyanoethyl) diisopropylphosphoramidite (TPE phosphoramidite), required for the solid-phase synthesis of the tetraphenylethylene (TPE)-modified oligonucleotide **ON1**, followed published procedures.<sup>1</sup> HPLC purified oligonucleotide **ON2** was purchased from Merck (Germany), HPLC purified oligonucleotides **ON5** and **ON6** were purchased from Microsynth (Switzerland). Water was used from a Milli-Q system. Mass spectra were obtained from the Analytical Research and Services (ARS) of the University of Bern, Switzerland, on a Thermo Fisher LTQ Orbitrap XL using Nano Electrospray Ionization (NSI). All mass spectra were measured in negative ion mode in mixtures of acetonitrile/water/triethylamine.

## 2. Preparation of Oligonucleotides

TPE-DNA conjugate **ON1** (Table S1) was synthesized on an Applied Biosystems 394 DNA/RNA synthesizer applying a standard cyanoethyl phosphoramidite coupling protocol on a 1  $\mu$ mol scale. A coupling time of 30 seconds was employed for the DNA nucleobases (0.1 M in anhydrous acetonitrile) and 2 minutes for TPE phosphoramidite (0.1 M solution in anhydrous 1,2-dichloroethane). The synthesis was started with a TPE-modified long chain alkylamine controlled pore glass (LCAA-CPG, 500 Å) solid-support, which was prepared according to previously reported procedures.<sup>1</sup> After the solid-phase synthesis, **ON1** was cleaved and deprotected by treatment with aqueous NH<sub>4</sub>OH (28-30%) at 55 °C overnight. The supernatant was collected, and the solid-support was washed three times with a solution of ethanol and Milli-Q H<sub>2</sub>O (1:1, 3x1 mL), before the crude TPE-DNA conjugate was lyophilized.

TPE-DNA conjugate **ON1** was purified by reversed-phase HPLC (*Shimadzu LC-20AT, LiChrospher 100 RP-18*, 5  $\mu$ m, 250 x 4 mm) at 50 °C with a flow rate of 1 mL/min,  $\lambda$ : 330 nm. Solvent A: aqueous 2.1 mM triethylamine (TEA) / 25 mM 1,1,1,3,3,3-hexafluoropropan-2-ol (HFIP) pH 8; solvent B: acetonitrile; B [%] ( $t_R$  [min]) = 5 (0), 50 (24). The purified TPE-DNA conjugate **ON1** was dissolved in a 1:1 ethanol/Milli-Q H<sub>2</sub>O mixture (1 mL). The absorbance was measured at 260 nm to determine the concentration of the stock solution. The calculation was according to the Beer-Lambert law. The following molar absorptivities (at 260 nm) in [L/mol·cm] were used for the DNA nucleobases:  $\epsilon_A$ : 15'300;  $\epsilon_T$ : 9'000;  $\epsilon_G$ : 11'700;  $\epsilon_C$ : 7'400. A molar absorptivity of  $\epsilon_{TPE}$ : 35'975 was used for one TPE modification. The corresponding HPLC trace of **ON1** is displayed in Figure S1, the MS result is listed in Table S1, and the MS spectra are presented in Figure S2 and Figure S3.

A general experimental procedure is described for the preparation of **ON3** and **ON4**, which was carried out according to standard copper-catalyzed azide-alkyne click chemistry conditions, starting with **ON6** (Table S1 and Scheme S1).<sup>2</sup> mPEG2000 azide (PEG average  $M_n$  2000 Da) and mPEG5000 azide (PEG average  $M_n$  5000 Da) were used for the preparation of **ON3** and **ON4**, respectively, which yielded PEG-DNA conjugates with a distribution of different PEG chain lengths. The alkyne-modified oligonucleotide **ON6** was dissolved in Milli-Q H<sub>2</sub>O (c: 225  $\mu$ M). 2 M triethylammonium acetate (TEAA) buffer pH 7.0 (28  $\mu$ L) was added to **ON6** (84  $\mu$ L) in an Eppendorf tube, followed by DMSO (117  $\mu$ L). The reaction mixture was vortexed, before a 3 mM solution of the respective mPEG azide in DMSO (9.5  $\mu$ L) was added. A solution of 5 mM ascorbic acid in Milli-Q H<sub>2</sub>O (28  $\mu$ L) was added. The reaction mixture was vortexed briefly, then degassed by bubbling argon in it for 30 seconds. A solution of 10 mM Cu(II)-TBTA (TBTA: tris((1-benzyl-4-triazolyl)methyl)amine) in Milli-Q H<sub>2</sub>O/DMSO 45:55 (14  $\mu$ L) was added, before the Eppendorf tube was flushed with argon, sealed, vortexed thoroughly, and shaken in a ThermoMixer for 25 h (25 °C, 500 rpm). Afterwards, the reaction mixture was lyophilized.

The crude PEG conjugated oligonucleotides **ON3** and **ON4** respectively, were purified by reversed-phase HPLC (*Shimadzu LC-20AT, ReproSil 100 C18*, 5  $\mu$ m, 250 x 4 mm) at 40 °C with a flow rate of 1 mL/min,  $\lambda$ : 260 nm. Solvent A: aqueous 0.1 M TEAA buffer pH 7; solvent B: acetonitrile; B [%] ( $t_R$  [min]) = 0 (0), 0 (1), 5 (2), 60 (22). The purified oligomers were dissolved in Milli-Q H<sub>2</sub>O (130  $\mu$ L). The concentration of the final stock solutions of **ON3** and **ON4** followed the same experimental procedure as stated above for **ON1**. The corresponding HPLC traces of **ON3** and **ON4** are displayed in Figure S1, the MS results are listed in Table S1, and the MS spectra are presented in Figure S4 – Figure S8.

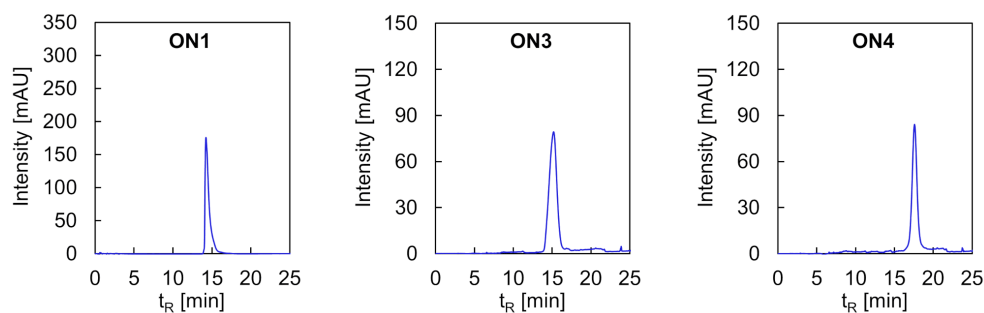

**Figure S1.** HPLC traces of **ON1**, **ON3**, and **ON4**.

**Table S1.** Oligonucleotide sequences of **ON1**, **ON3**, **ON4**, and **ON6**, calculated and found masses by NSI-MS. <sup>a</sup> Calculated mass for n = 45 PEG units. <sup>b</sup> Calculated mass for n = 110 PEG units.

| Strand     | Sequence (5'→3')                                                                    | calc. mass              | found mass |
|------------|-------------------------------------------------------------------------------------|-------------------------|------------|
| <b>ON1</b> | ( <b>TPE</b> ) <sub>3</sub> -CTT CCT TGC ATG GGA CCT TG-( <b>TPE</b> ) <sub>3</sub> | 9215.9945               | 9216.0492  |
| <b>ON3</b> | CAA GGT CCG ATG CAA GGA AG- <b>PEG2000</b>                                          | 8616.4266 <sup>a</sup>  | 8616.4650  |
| <b>ON4</b> | CAA GGT CCG ATG CAA GGA AG- <b>PEG5000</b>                                          | 11478.1306 <sup>b</sup> | 11478.1212 |
| <b>ON6</b> | CAA GGT CCG ATG CAA GGA AG- <b>Alkyne</b>                                           | —                       | —          |

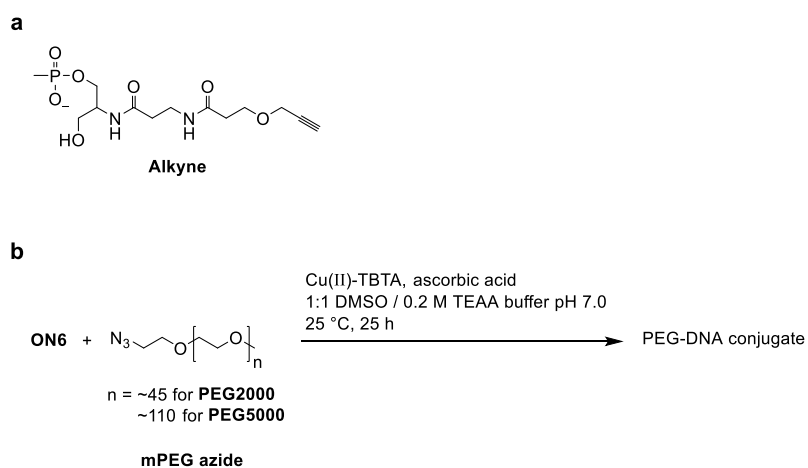

**Scheme S1.** (a) Chemical structure of alkyne modification of **ON6**. (b) Click reaction of **ON6** with mPEG azides.

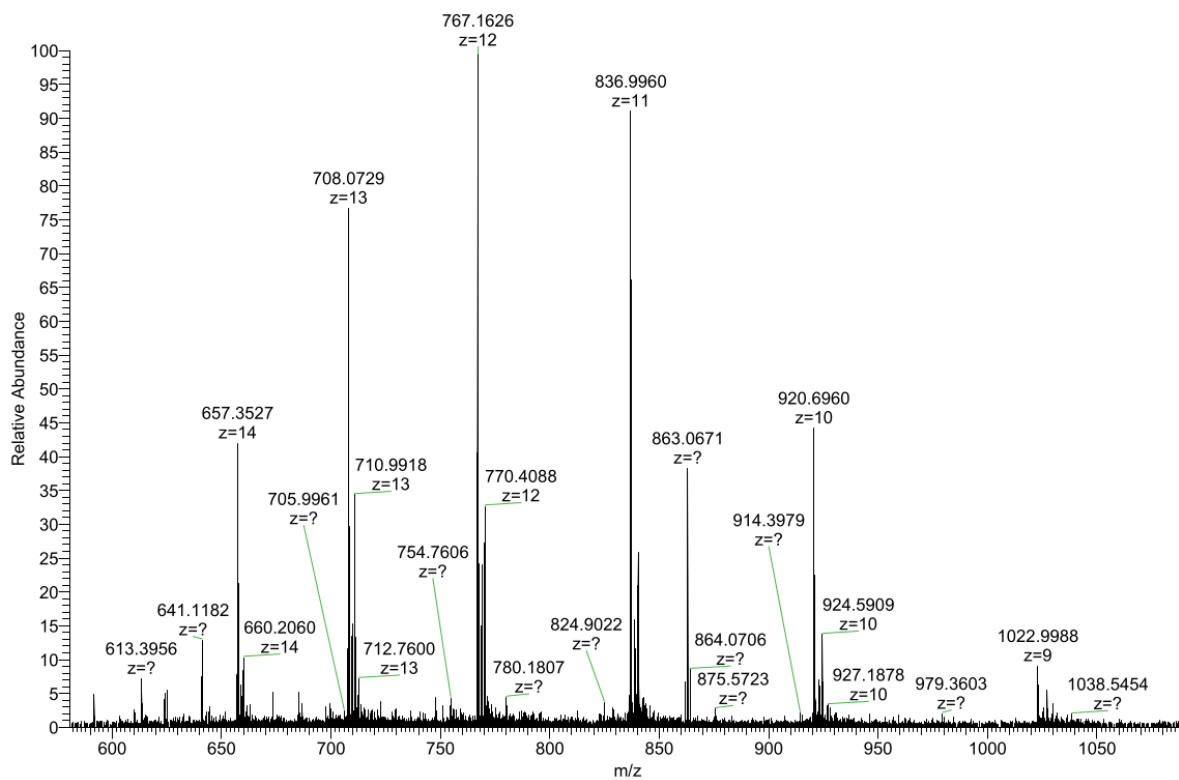

Figure S2. MS spectrum of ON1.

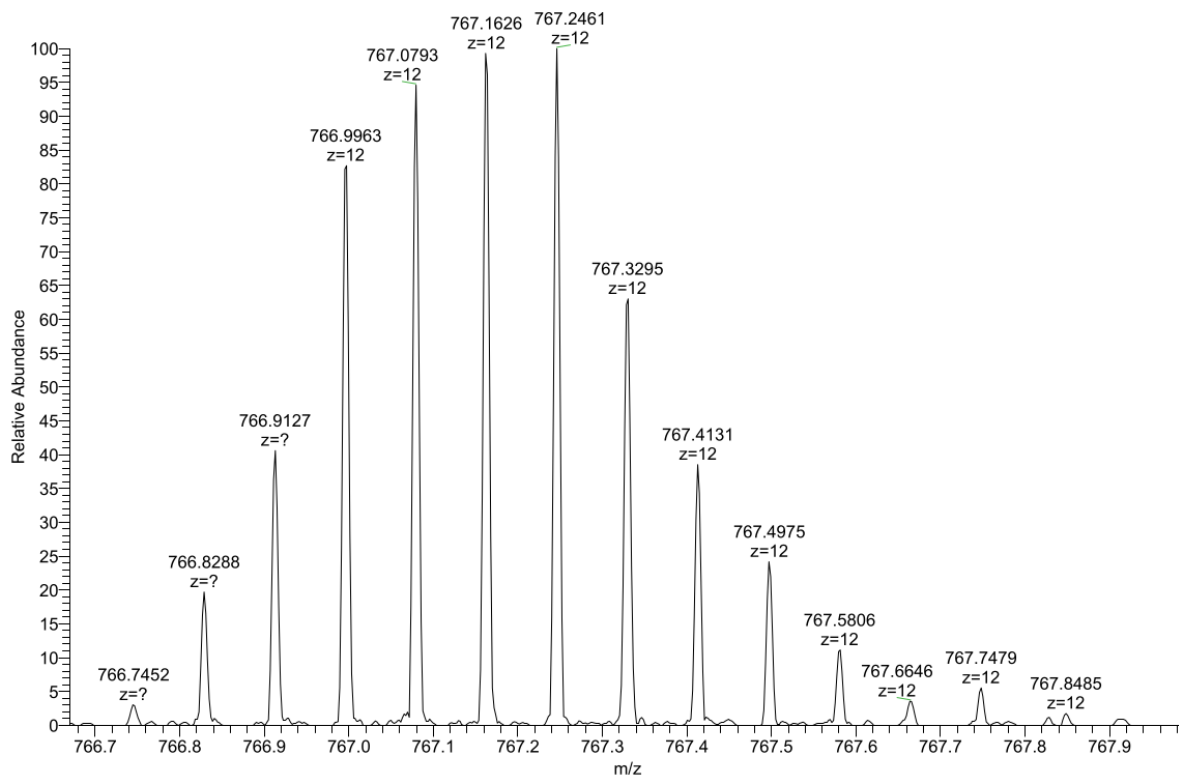

Figure S3. MS spectrum (zoom) of ON1.

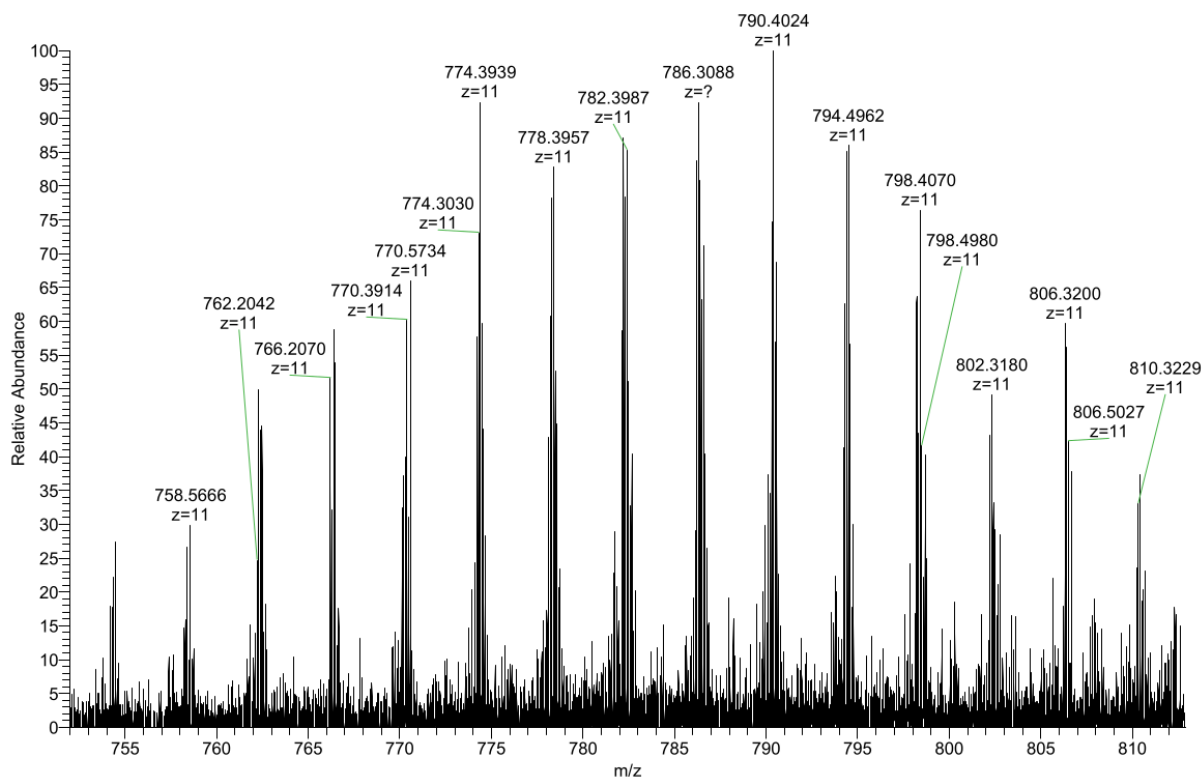

Figure S4. MS spectrum of ON3.

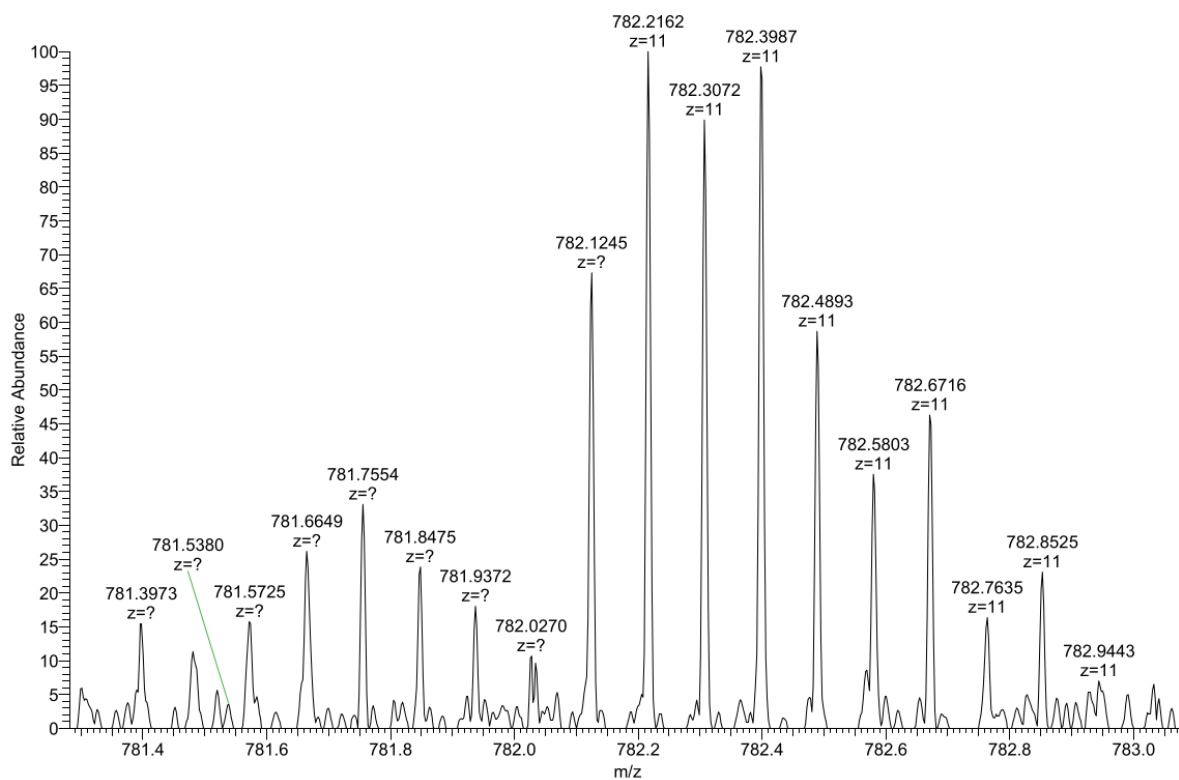

Figure S5. MS spectrum (zoom) of ON3.

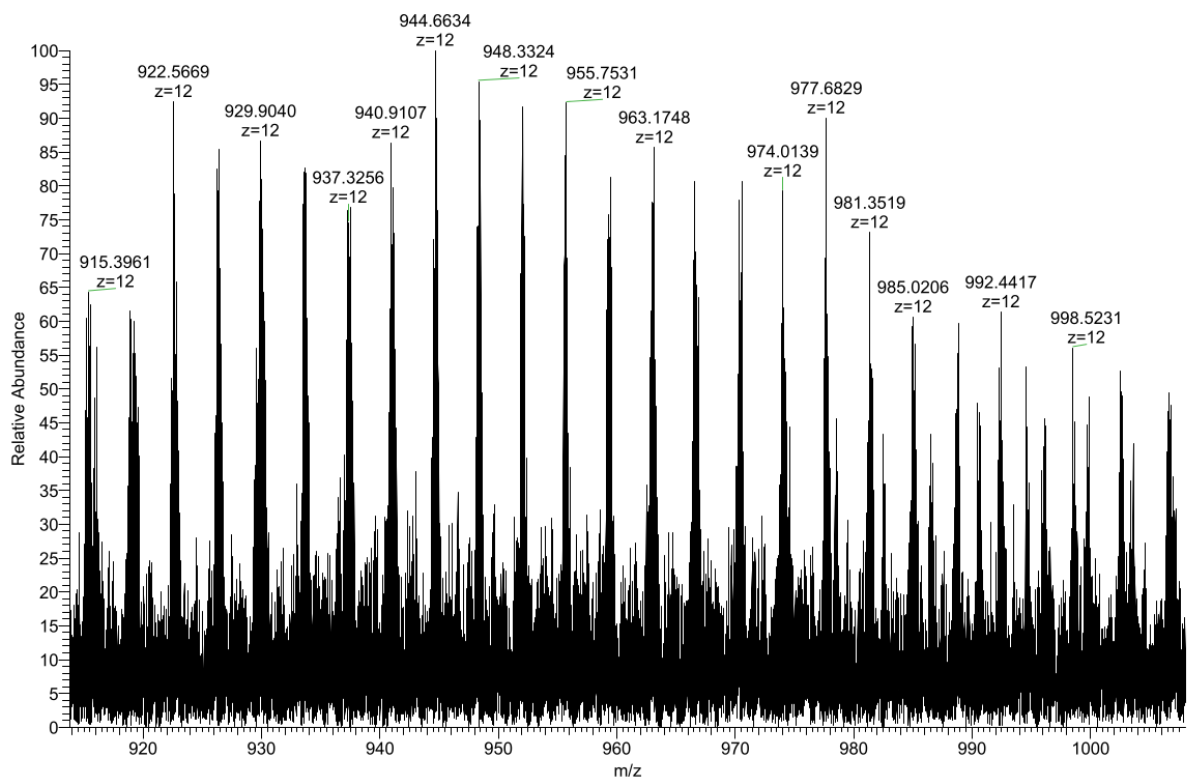

Figure S6. MS spectrum of ON4.

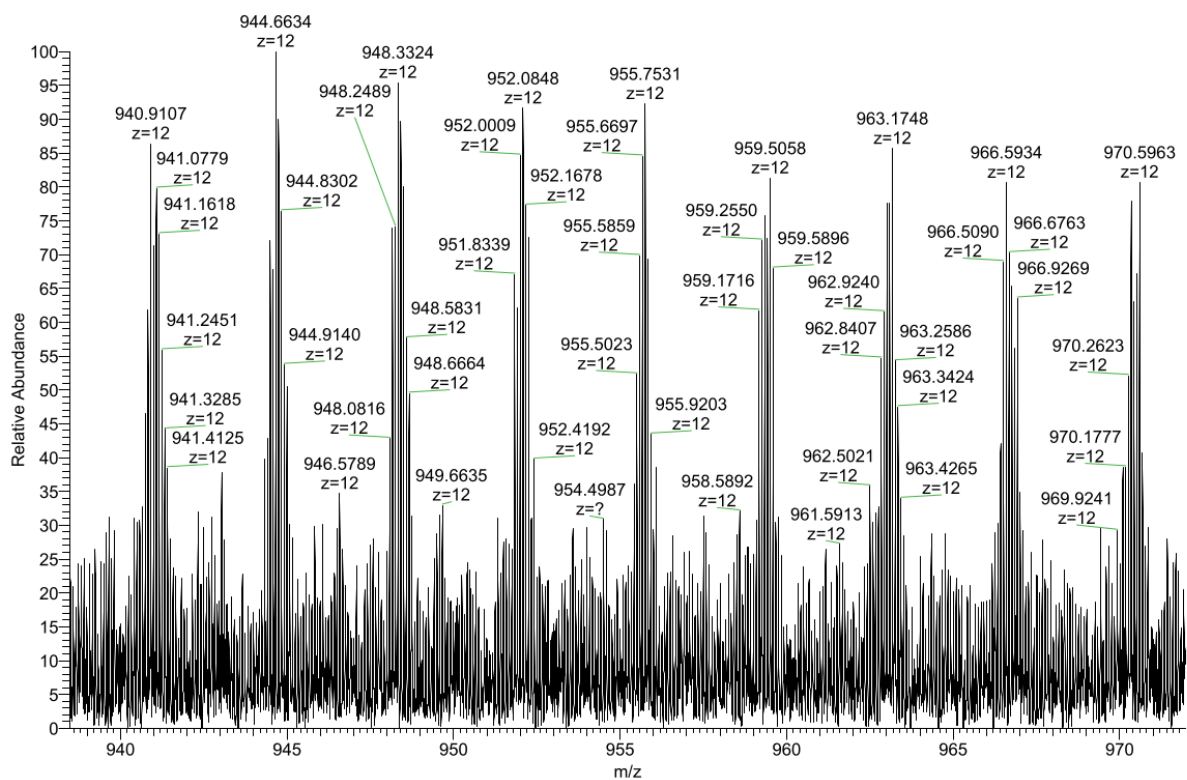

Figure S7. MS spectrum (zoom 1) of ON4.

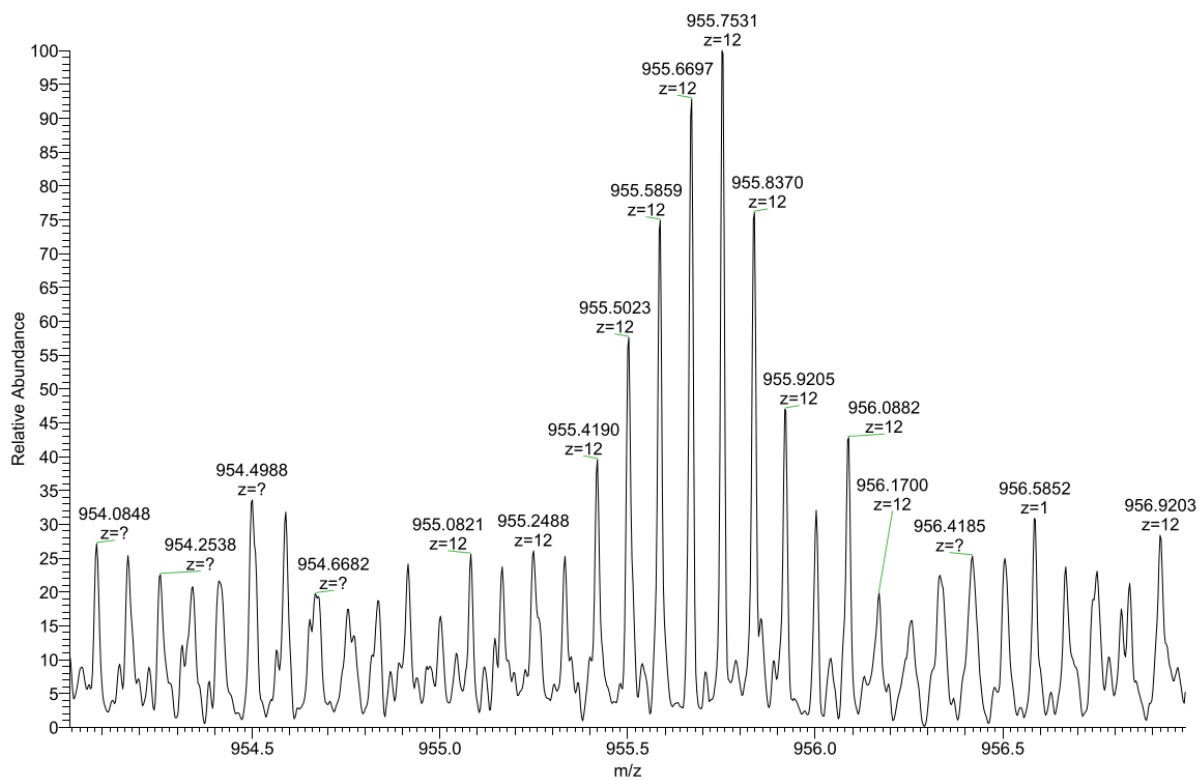

**Figure S8.** MS spectrum (zoom 2) of ON4.



### 3. UV-Vis and Fluorescence Spectra

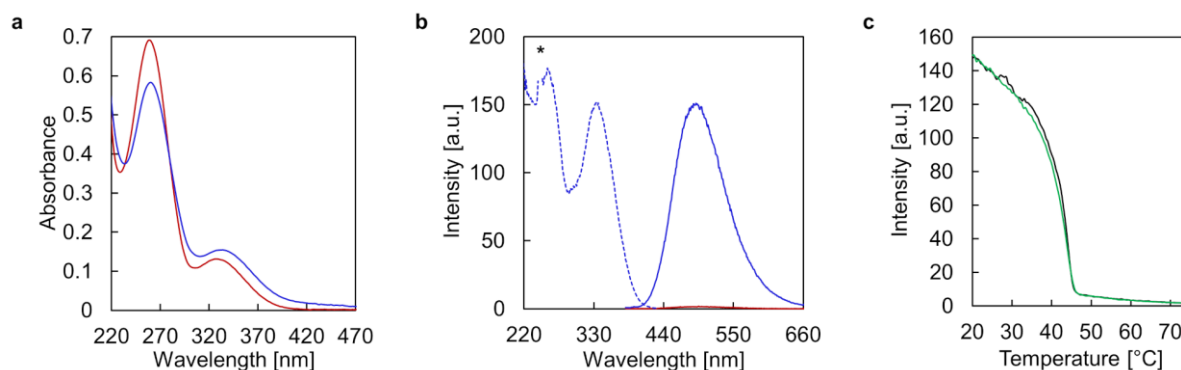

**Figure S9.** Temperature-dependent UV-Vis absorption (a), fluorescence emission (b, solid line) and excitation (b, dotted line) spectra of **ON1\*ON2** at 75 °C (red) and at 20 °C (blue) after thermally controlled assembly (0.5 °C/min; \* denotes second-order diffraction). (c) Fluorescence-monitored annealing (black) and melting (green) curves of **ON1\*ON2**. Conditions: 1  $\mu$ M **ON1\*ON2**, 10 mM sodium phosphate buffer pH 7.2, 0.1 mM spermine  $\cdot$  4 HCl, 30 vol% ethanol,  $\lambda_{\text{ex.}}$ : 335 nm,  $\lambda_{\text{em.}}$ : 490 nm.

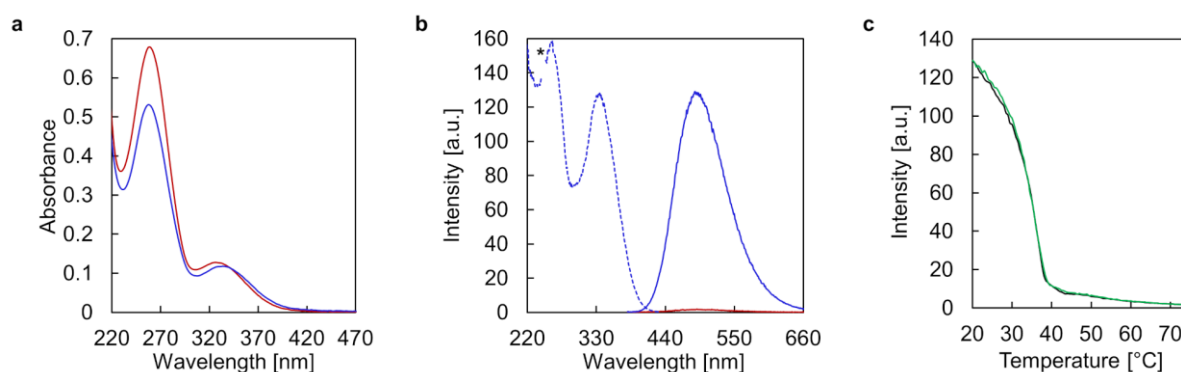

**Figure S10.** Temperature-dependent UV-Vis absorption (a), fluorescence emission (b, solid line) and excitation (b, dotted line) spectra of **ON1\*ON3** at 75 °C (red) and at 20 °C (blue) after thermally controlled assembly (0.5 °C/min; \* denotes second-order diffraction). (c) Fluorescence-monitored annealing (black) and melting (green) curves of **ON1\*ON3**. Conditions: 1  $\mu$ M **ON1\*ON3**, 10 mM sodium phosphate buffer pH 7.2, 0.1 mM spermine  $\cdot$  4 HCl, 30 vol% ethanol,  $\lambda_{\text{ex.}}$ : 335 nm,  $\lambda_{\text{em.}}$ : 490 nm.

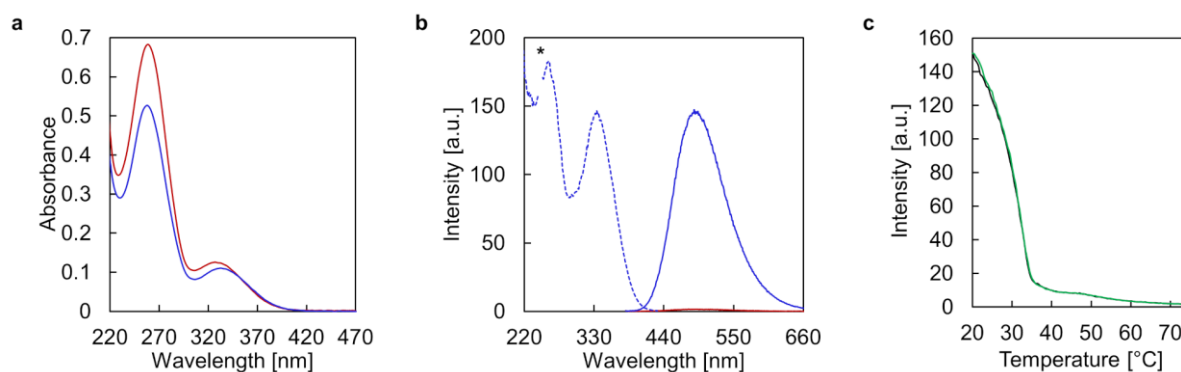

**Figure S11.** Temperature-dependent UV-Vis absorption (a), fluorescence emission (b, solid line) and excitation (b, dotted line) spectra of **ON1\*ON4** at 75 °C (red) and at 20 °C (blue) after thermally controlled assembly (0.5 °C/min; \* denotes second-order diffraction). (c) Fluorescence-monitored annealing (black) and melting (green) curves of **ON1\*ON4**. Conditions: 1  $\mu$ M **ON1\*ON4**, 10 mM sodium phosphate buffer pH 7.2, 0.1 mM spermine  $\cdot$  4 HCl, 30 vol% ethanol,  $\lambda_{\text{ex.}}$ : 335 nm,  $\lambda_{\text{em.}}$ : 490 nm.

## 4. Cryo-EM Images

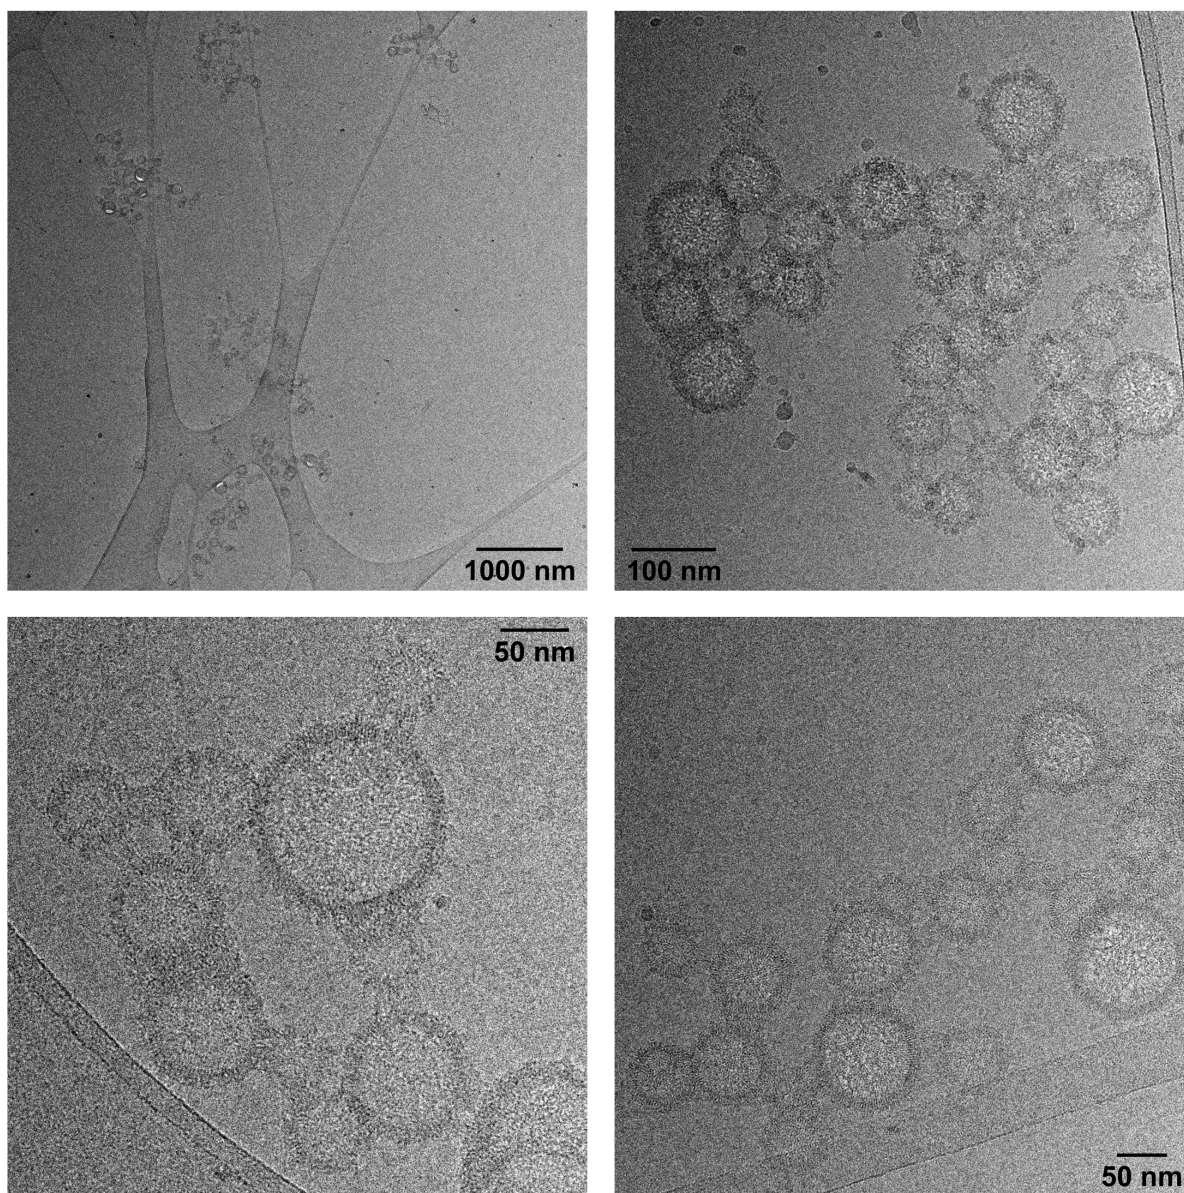

**Figure S12.** Additional cryo-EM images of self-assembled **ON1\*ON2**. Conditions: 1  $\mu\text{M}$  **ON1\*ON2**, 10 mM sodium phosphate buffer pH 7.2, 0.1 mM spermine  $\cdot$  4 HCl, 30 vol% ethanol.

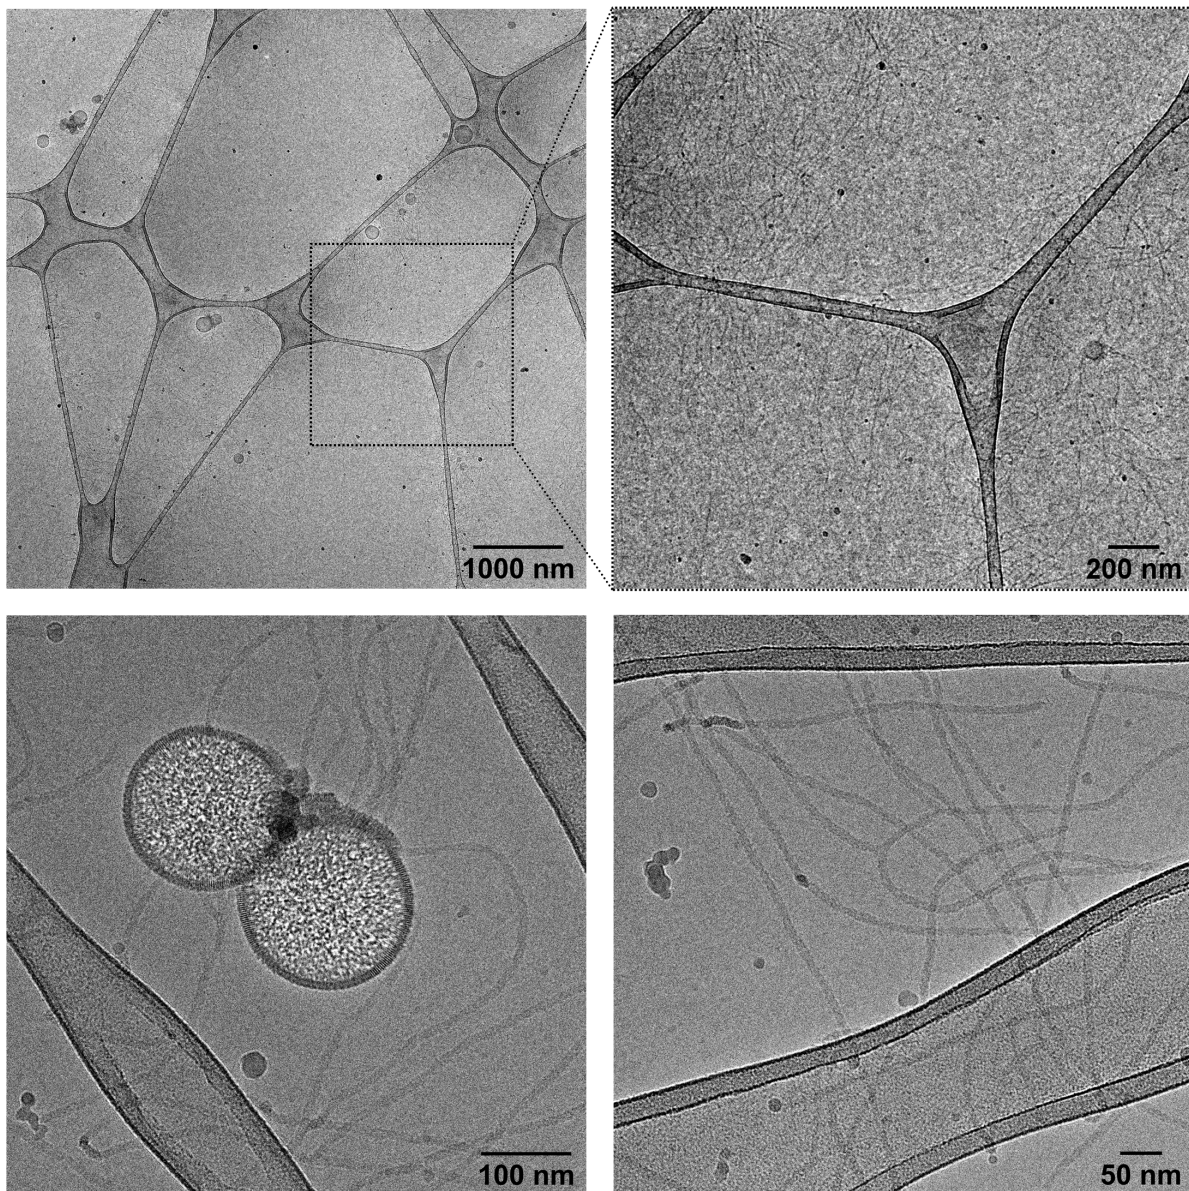

**Figure S13.** Additional cryo-EM images of self-assembled **ON1\*ON3**. Conditions: 1  $\mu\text{M}$  **ON1\*ON3**, 10 mM sodium phosphate buffer pH 7.2, 0.1 mM spermine  $\cdot$  4 HCl, 30 vol% ethanol.

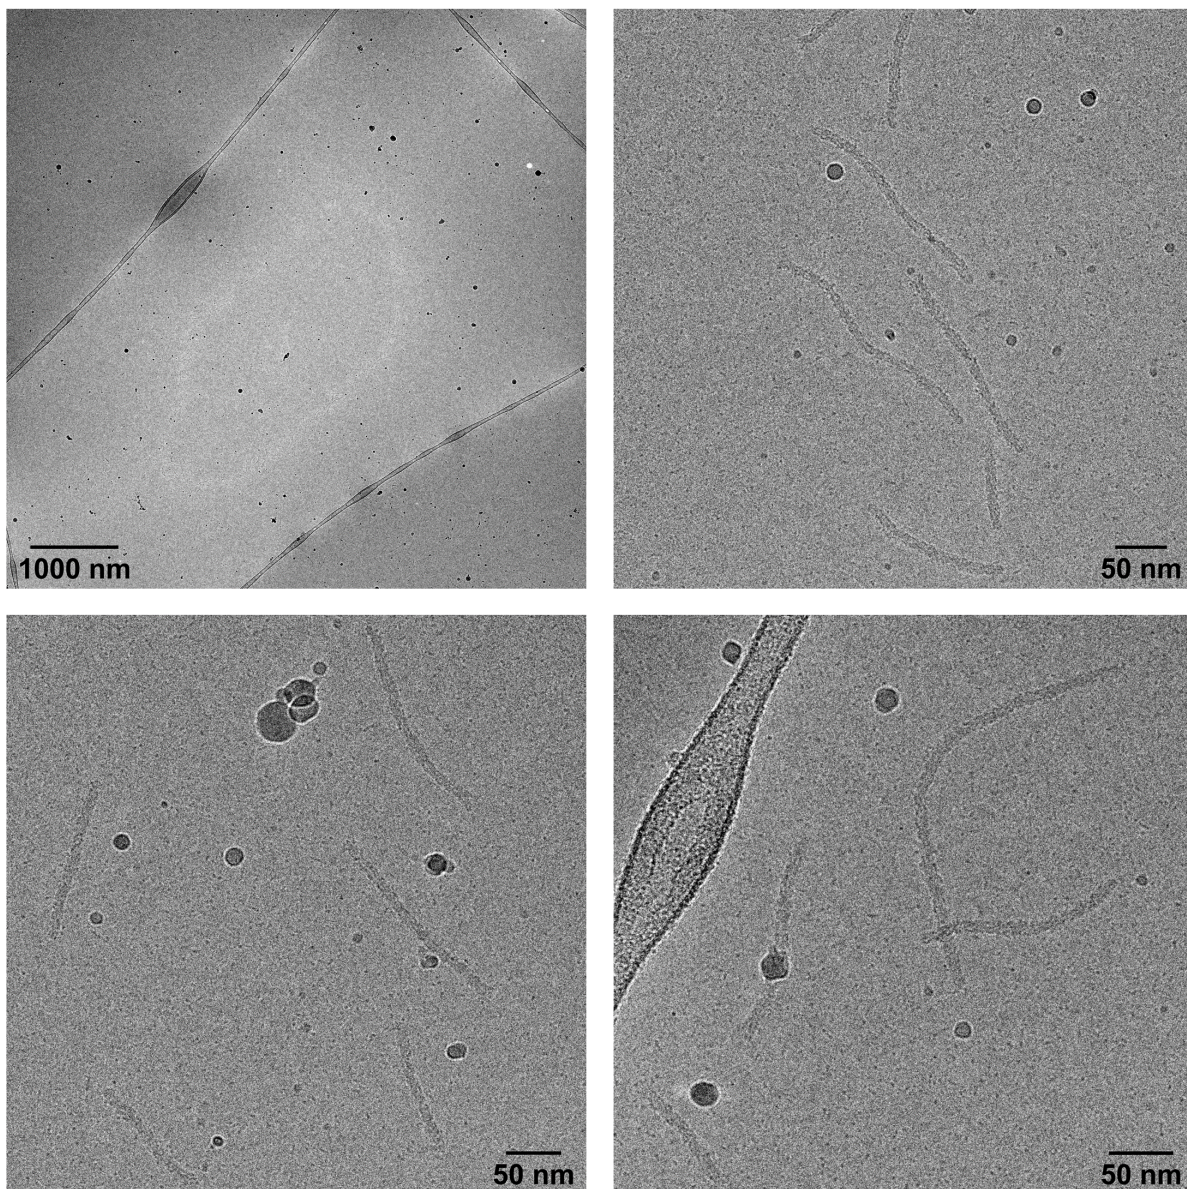

**Figure S14.** Additional cryo-EM images of self-assembled **ON1\*ON4**. Conditions: 1  $\mu\text{M}$  **ON1\*ON4**, 10 mM sodium phosphate buffer pH 7.2, 0.1 mM spermine  $\cdot$  4 HCl, 30 vol% ethanol.

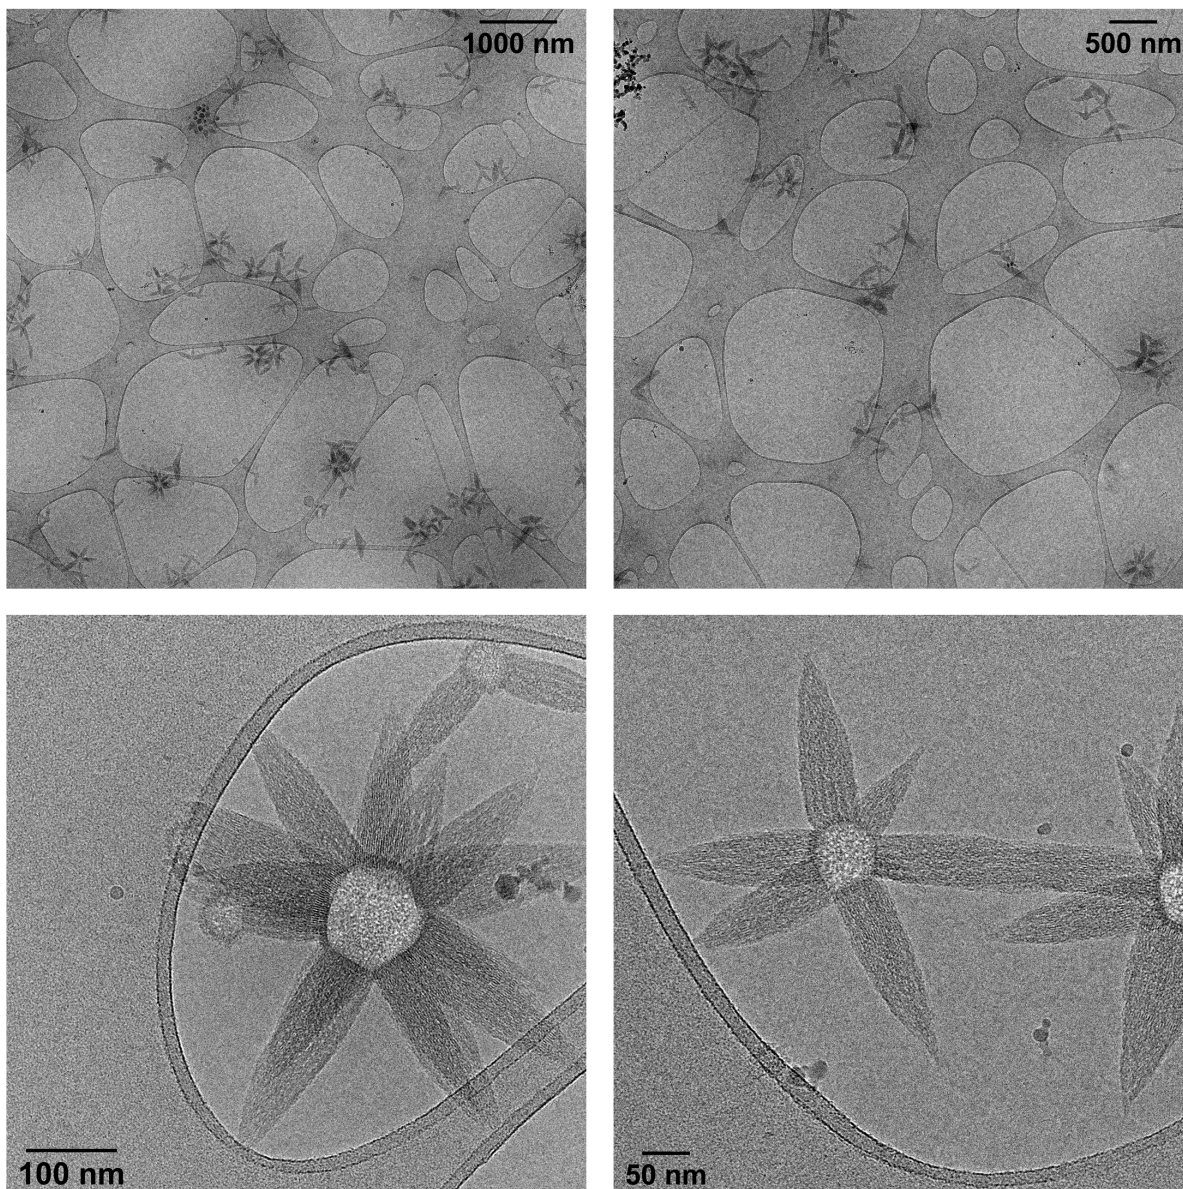

**Figure S15.** Additional cryo-EM images of self-assembled **ON1\*ON5**. Conditions: 1  $\mu\text{M}$  **ON1\*ON5**, 10 mM sodium phosphate buffer pH 7.2, 0.1 mM spermine  $\cdot$  4 HCl, 30 vol% ethanol.

## 5. Distance Measurements

**Table S2.** Summary of distance measurements on cryo-EM images. The reported distances are mean values with the corresponding standard deviation, along with the number of measurements in brackets.

| Duplex         | Vesicle membrane thickness     | DNA width                     | Ribbon thickness               |
|----------------|--------------------------------|-------------------------------|--------------------------------|
| <b>ON1*ON2</b> | $10.7 \pm 0.6$ nm ( $n = 40$ ) | $2.5 \pm 0.3$ nm ( $n = 43$ ) | –                              |
| <b>ON1*ON3</b> | $10.0 \pm 0.5$ nm ( $n = 52$ ) | $2.4 \pm 0.3$ nm ( $n = 84$ ) | $10.1 \pm 0.7$ nm ( $n = 65$ ) |
| <b>ON1*ON4</b> | –                              | –                             | $10.2 \pm 0.7$ nm ( $n = 68$ ) |
| <b>ON1*ON5</b> | $10.5 \pm 0.5$ nm ( $n = 46$ ) | $2.5 \pm 0.2$ nm ( $n = 79$ ) | –                              |

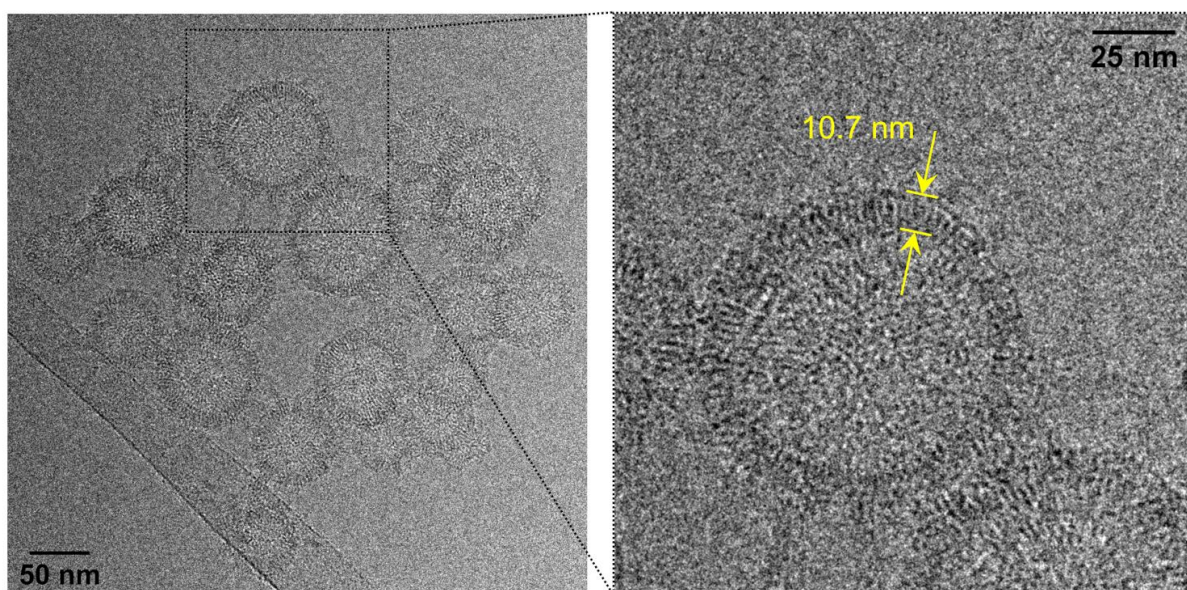

**Figure S16.** Representative vesicle membrane thickness measurement of self-assembled ON1\*ON2.

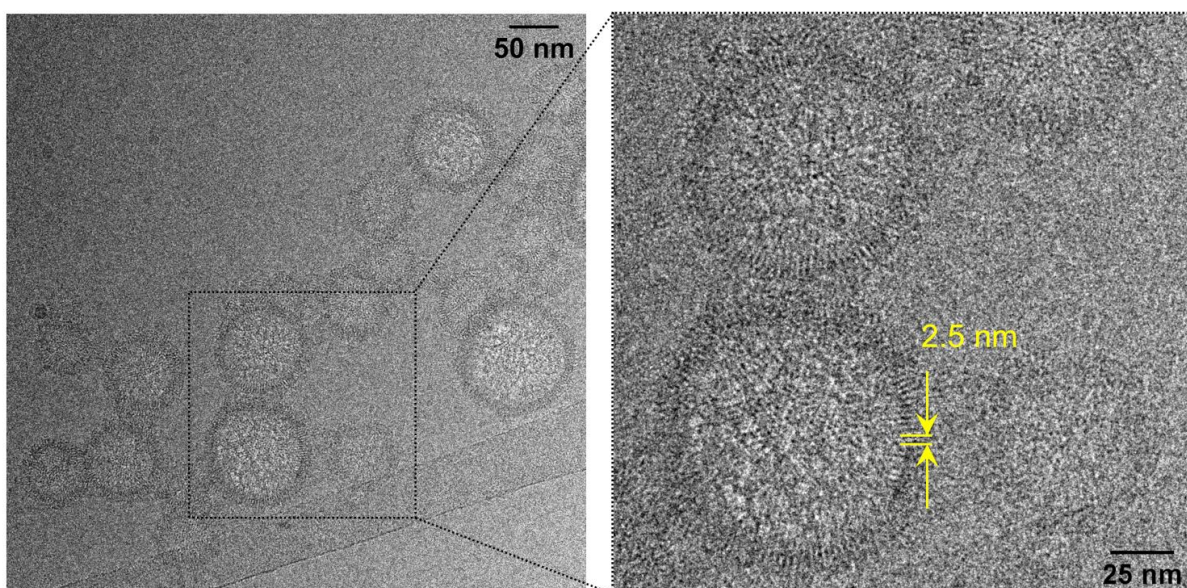

**Figure S17.** Representative DNA width measurement of self-assembled ON1\*ON2.

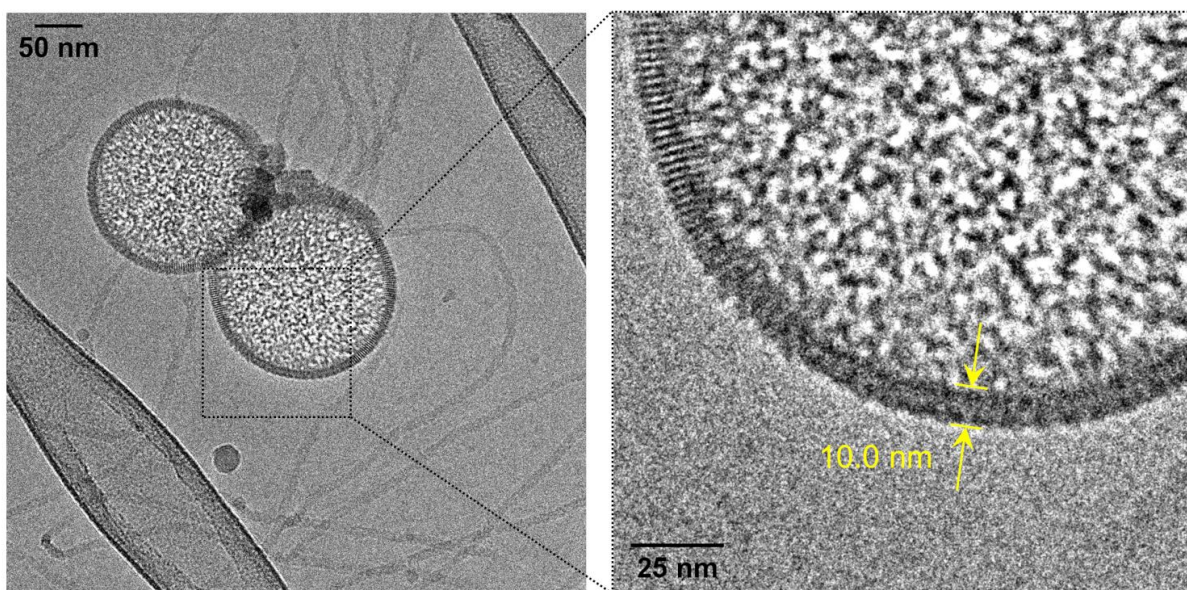

**Figure S18.** Representative vesicle membrane thickness measurement of self-assembled ON1\*ON3.

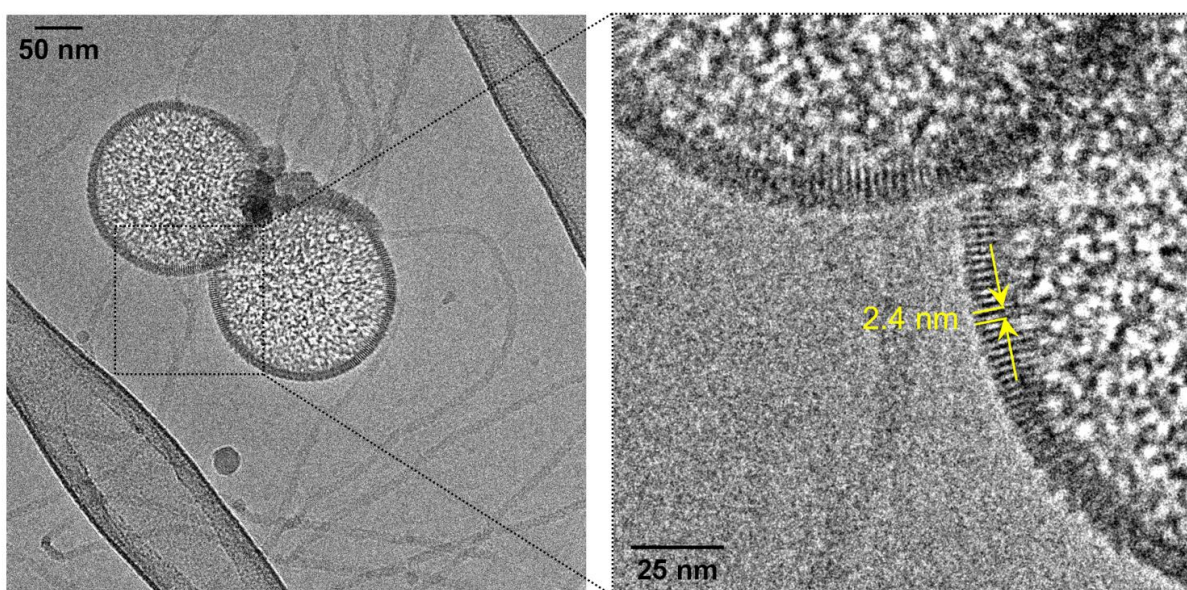

**Figure S19.** Representative DNA width measurement of self-assembled ON1\*ON3.

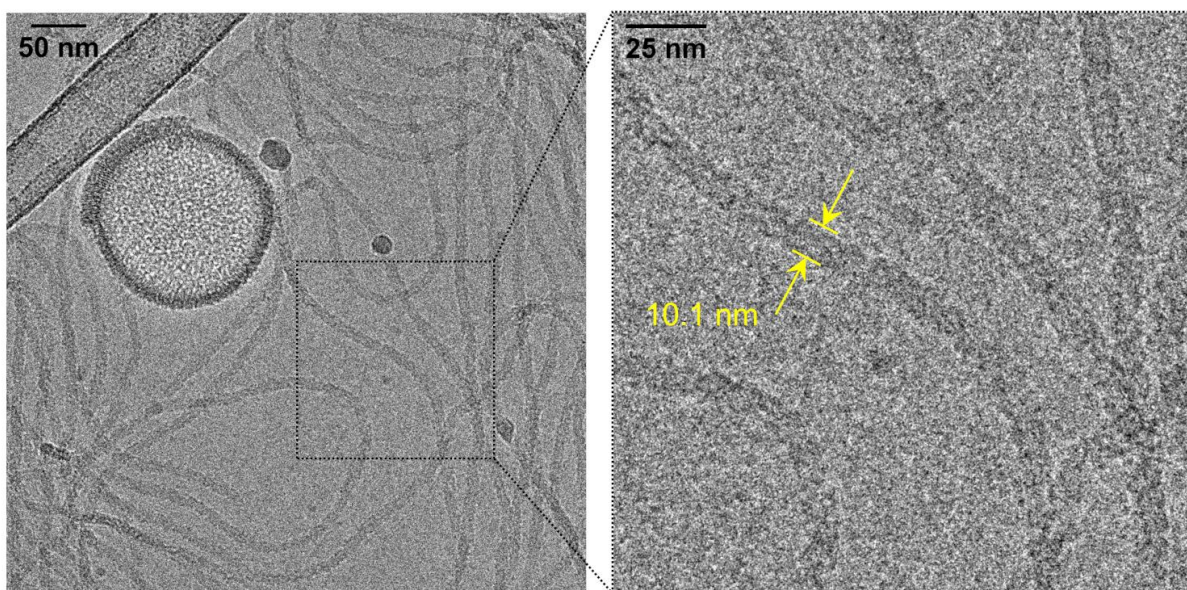

**Figure S20.** Representative ribbon thickness measurement of self-assembled ON1\*ON3.

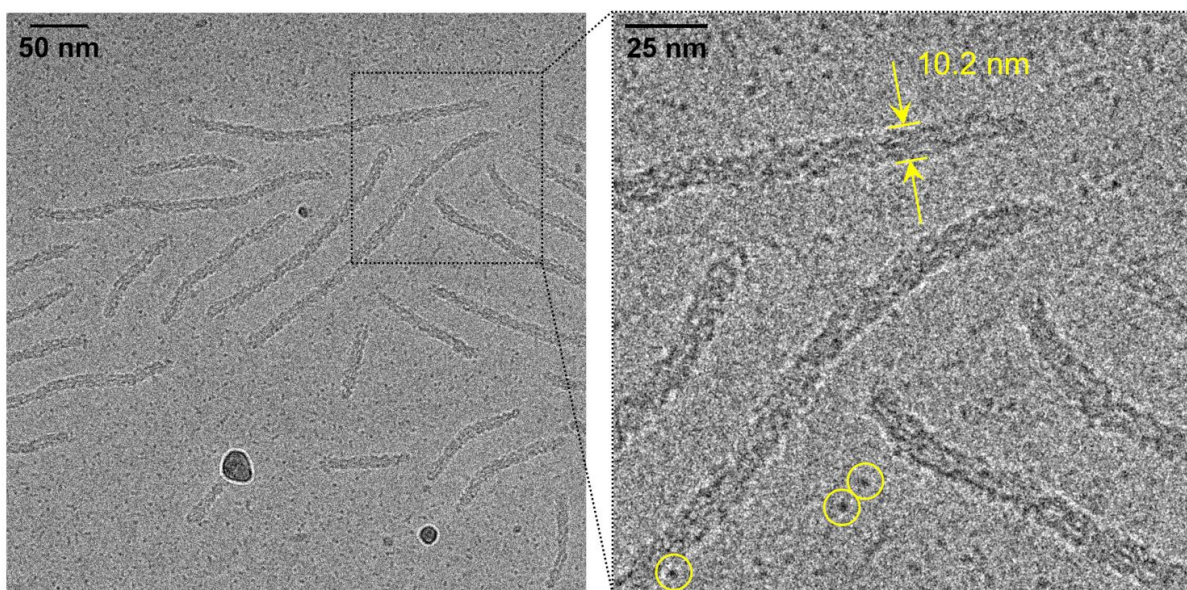

**Figure S21.** Representative ribbon thickness measurement of self-assembled ON1\*ON4, as well as single DNA duplexes ON1\*ON4 encircled in yellow.



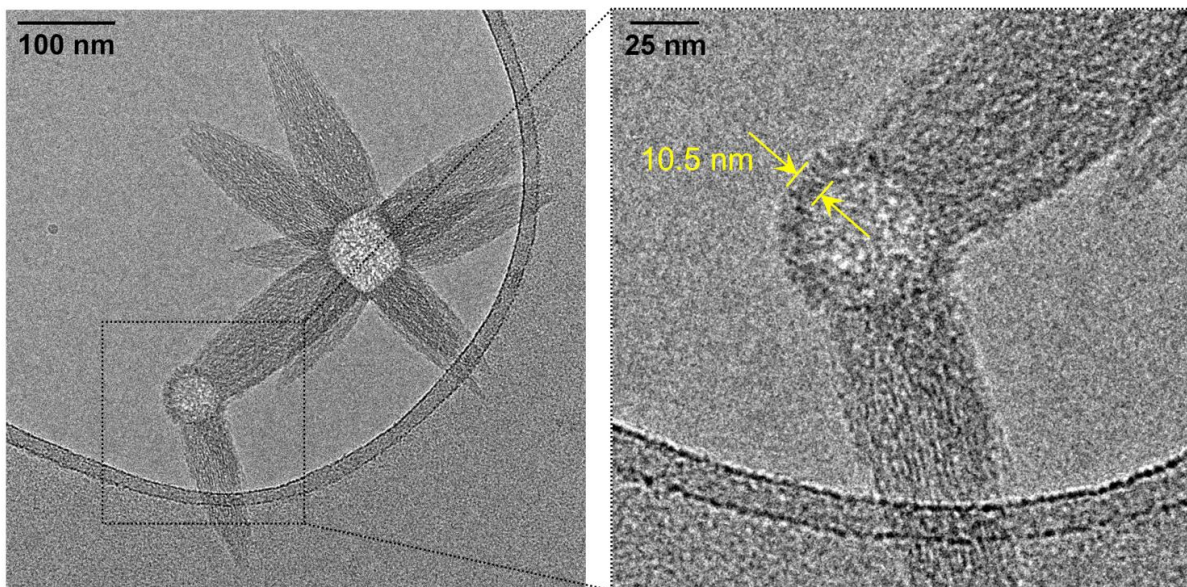

**Figure S22.** Representative vesicle membrane thickness measurement of self-assembled ON1\*ON5.

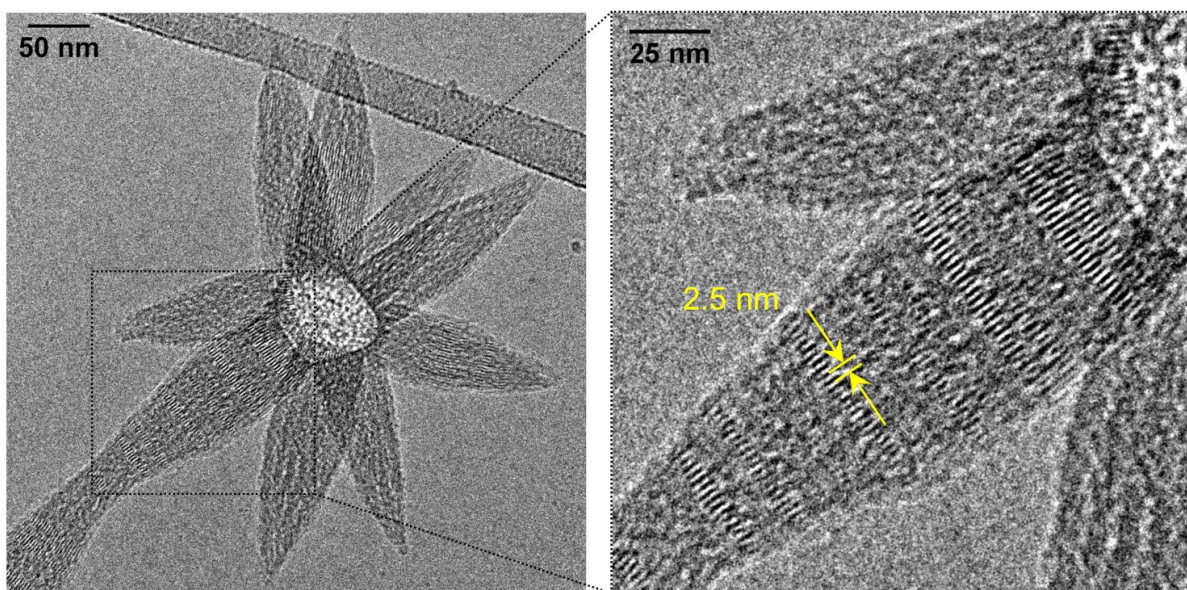

**Figure S23.** Representative DNA width measurement of self-assembled ON1\*ON5.

## 6. AFM Images

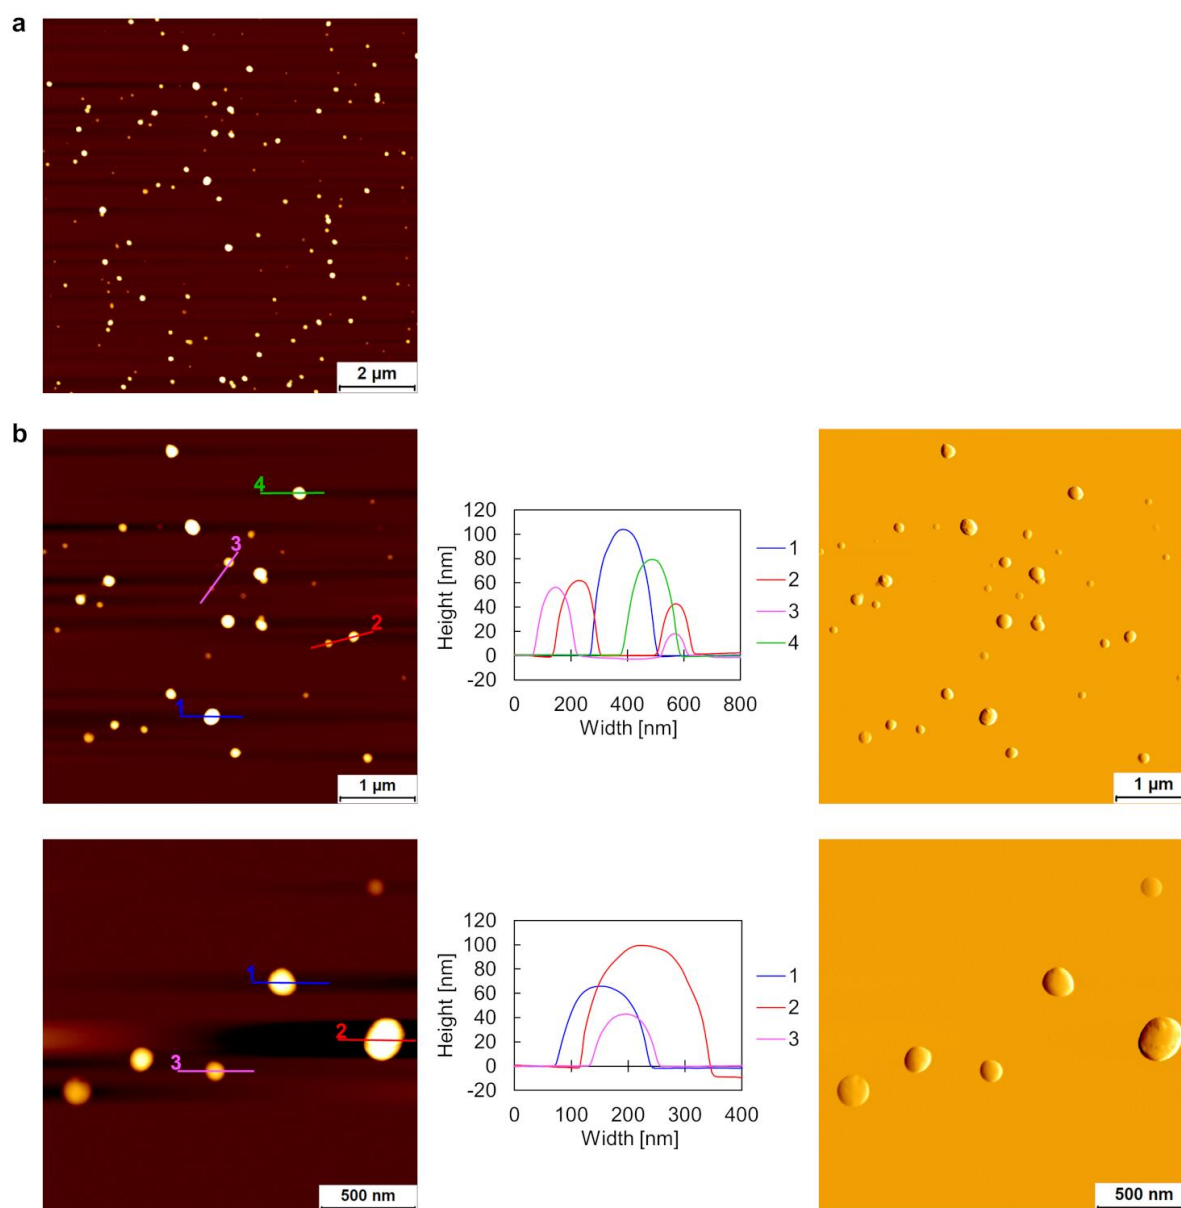

**Figure S24.** (a) AFM overview scan. (b) AFM zoom images incl. height profiles (left) and deflection scans (right). Conditions: 1  $\mu\text{M}$  ON1\*ON2, 10 mM sodium phosphate buffer pH 7.2, 0.1 mM spermine  $\cdot$  4 HCl, 30 vol% ethanol.

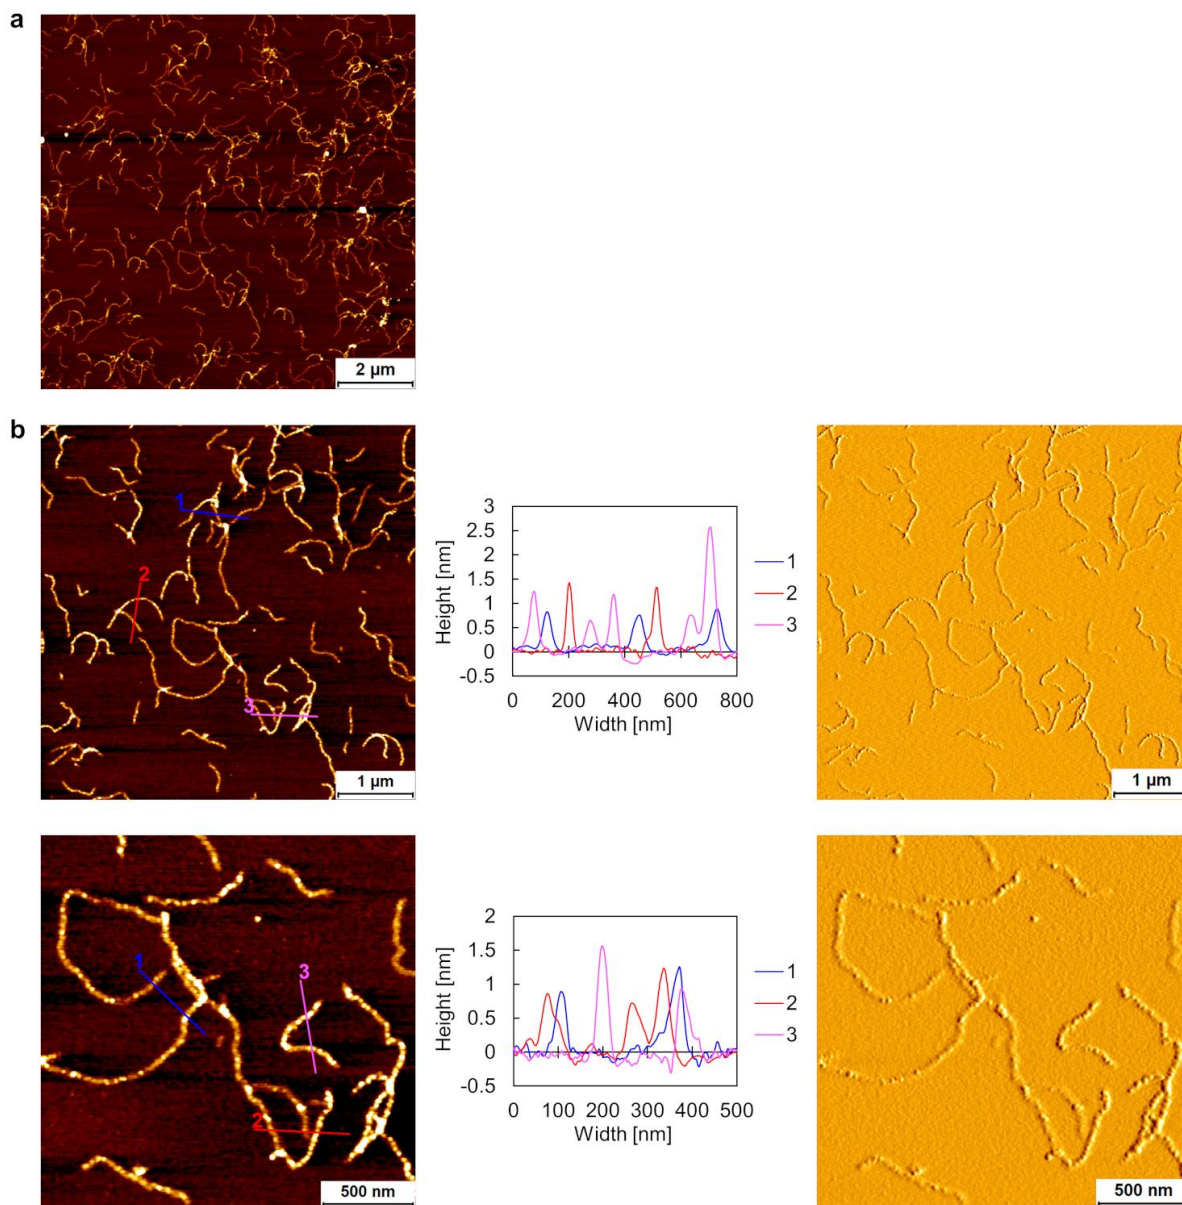

**Figure S25.** (a) AFM overview scan. (b) AFM zoom images incl. height profiles (left) and deflection scans (right). Conditions: 1  $\mu$ M ON1\*ON3, 10 mM sodium phosphate buffer pH 7.2, 0.1 mM spermine  $\cdot$  4 HCl, 30 vol% ethanol.

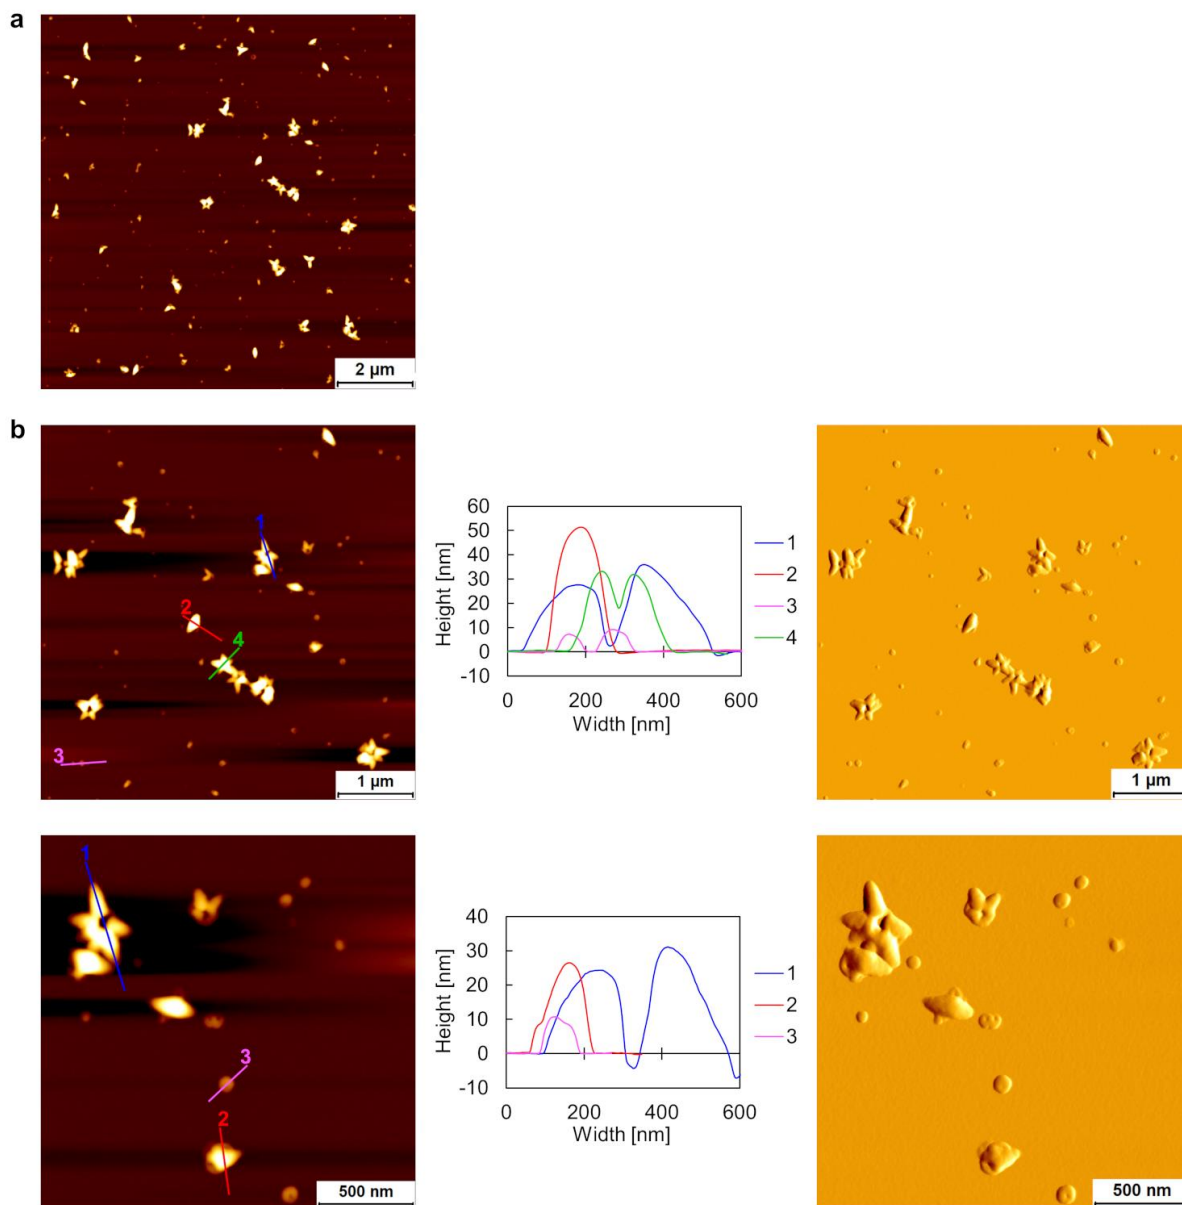

## 7. References

- (1) Rothenbühler, S.; Iacovache, I.; Langenegger, S. M.; Zuber, B.; Häner, R. Supramolecular Assembly of DNA-Constructed Vesicles. *Nanoscale* **2020**, *12* (41), 21118–21123.
- (2) Presolski, S. I.; Hong, V. P.; Finn, M. G. Copper-Catalyzed Azide-Alkyne Click Chemistry for Bioconjugation. *Curr. Protoc. Chem. Biol.* **2011**, *3*, 153–162.
